# Supplementary material for: Biphasic Expression of Atypical Chemokine Receptor (ACKR) 2 and ACKR4 in Colorectal Neoplasms in Association with Histopathological Findings
Source: MDPI journal article supplement (doi:10.3390/biom11010008), 2020-12-23
Supplement: s1 [file s1]

## Supplementary Materials

for Paulina Lewandowska et al. "Biphasic Expression of Atypical Chemokine Receptor (ACKR) 2 and ACKR4 in Colorectal Neoplasms in Association with Histopathological Findings"

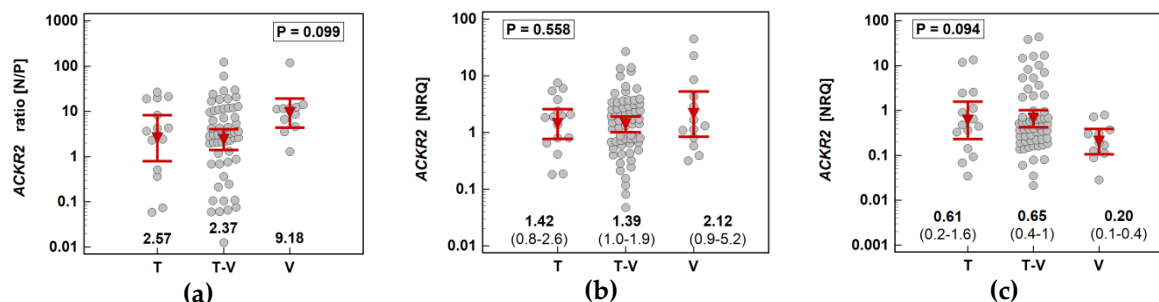

**Figure S1.** Impact of adenoma histological type on ACKR2 expression: (a) Normal-to-polyp expression ratio [N/P]; (b) In normal tissue; (c) In adenomas. Data presented as dot-plots with means (95% confidence interval) and analyzed using one-way analysis of variance. T, tubular adenomas; T-V, tubulo-villous adenomas; V, villous adenomas; NRQ, normalized relative quantity.

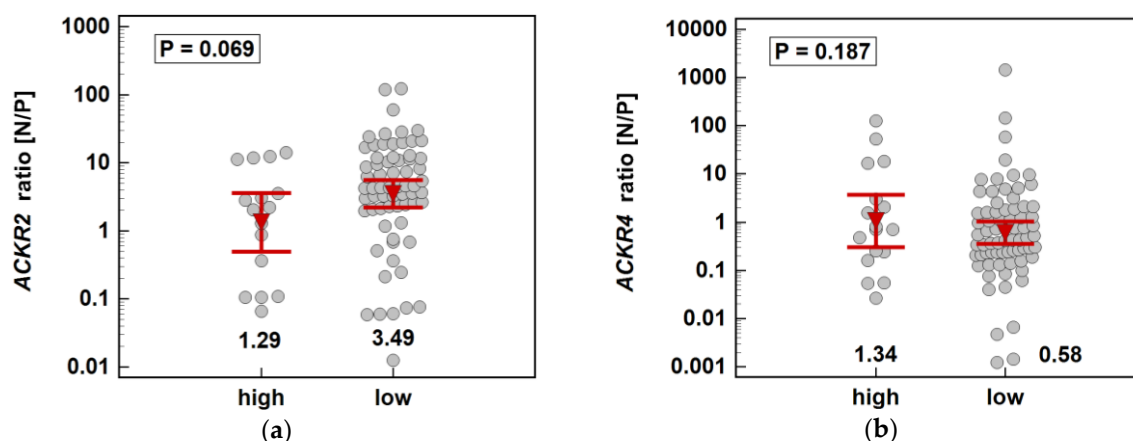

**Figure S2.** Impact of dysplasia grade on adenoma expression of: (a) ACKR2; (b) ACKR4. Data presented as dot-plots and mean normal-to-polyp [N/P] expression ratio and analyzed using t-test for independent samples.

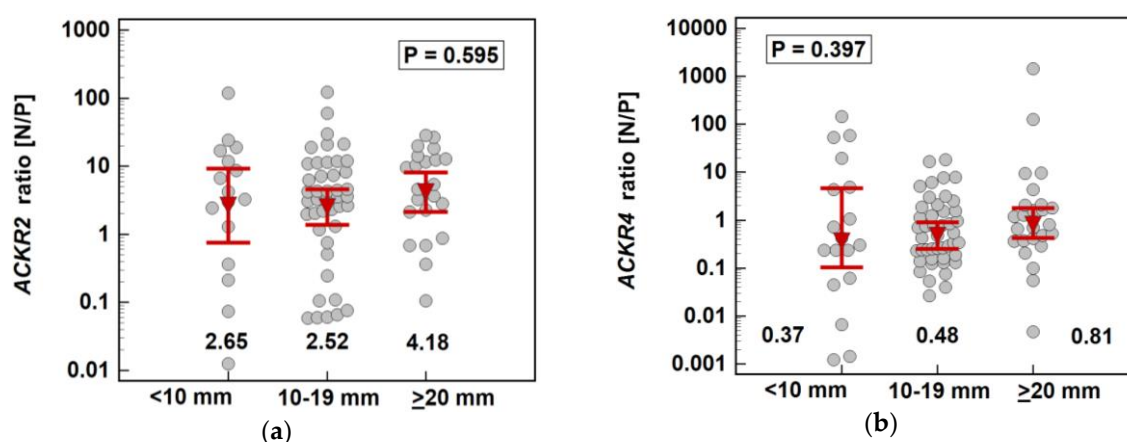

**Figure S3.** Impact of adenoma size on the expression of: (a) ACKR2; (b) ACKR4. Data presented as dot-plots and mean (ACKR2) or median (ACKR4) normal-to-polyp [N/P] expression ratio and analyzed using one-way analysis of variance or Kruskal-Wallis H test, respectively.

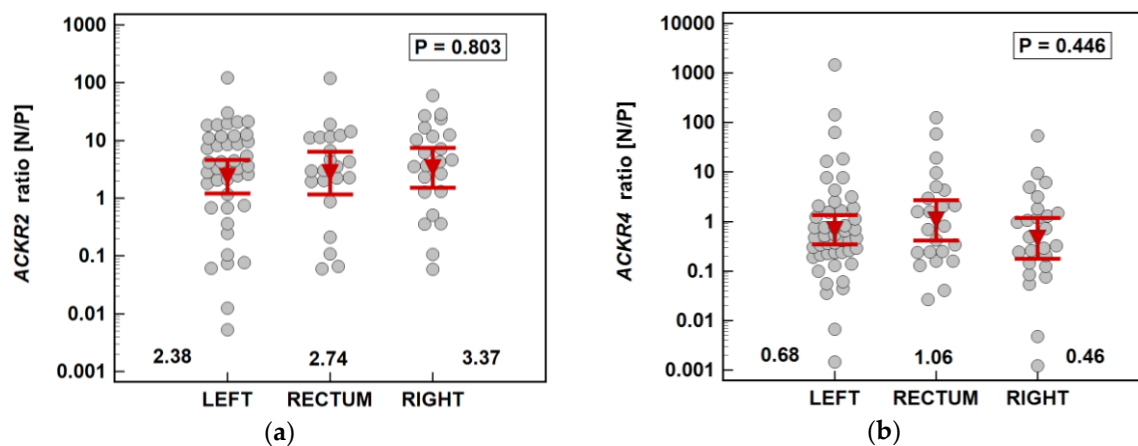

**Figure S4.** Impact of adenoma location on the expression of: (a) *ACKR2*; (b) *ACKR4*. Data presented as dot-plots and mean normal-to-polyp [N/P] expression ratio and analyzed using one-way analysis of variance.

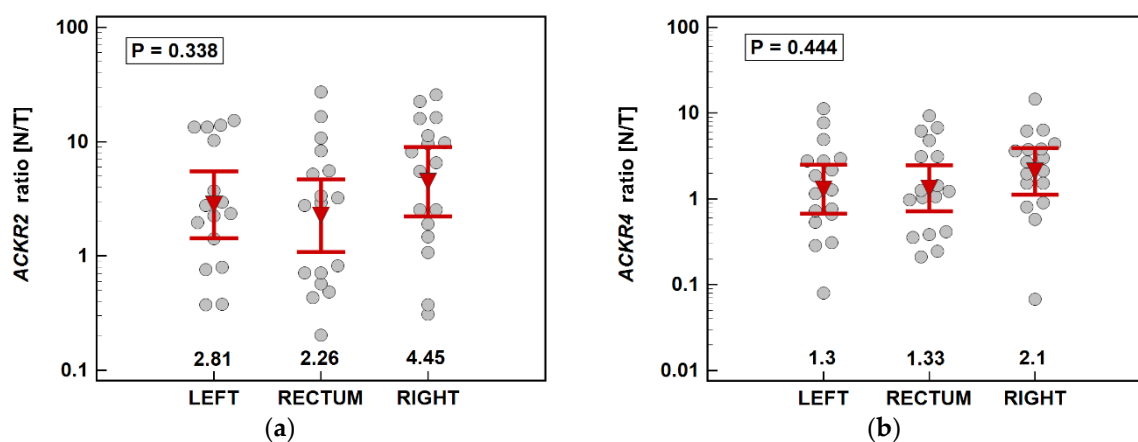

**Figure S5.** Impact of tumor location on the expression of: (a) *ACKR2*; (b) *ACKR4*. Data presented as dot-plots and mean normal-to-tumor [N/T] expression ratio and analyzed using one-way analysis of variance.

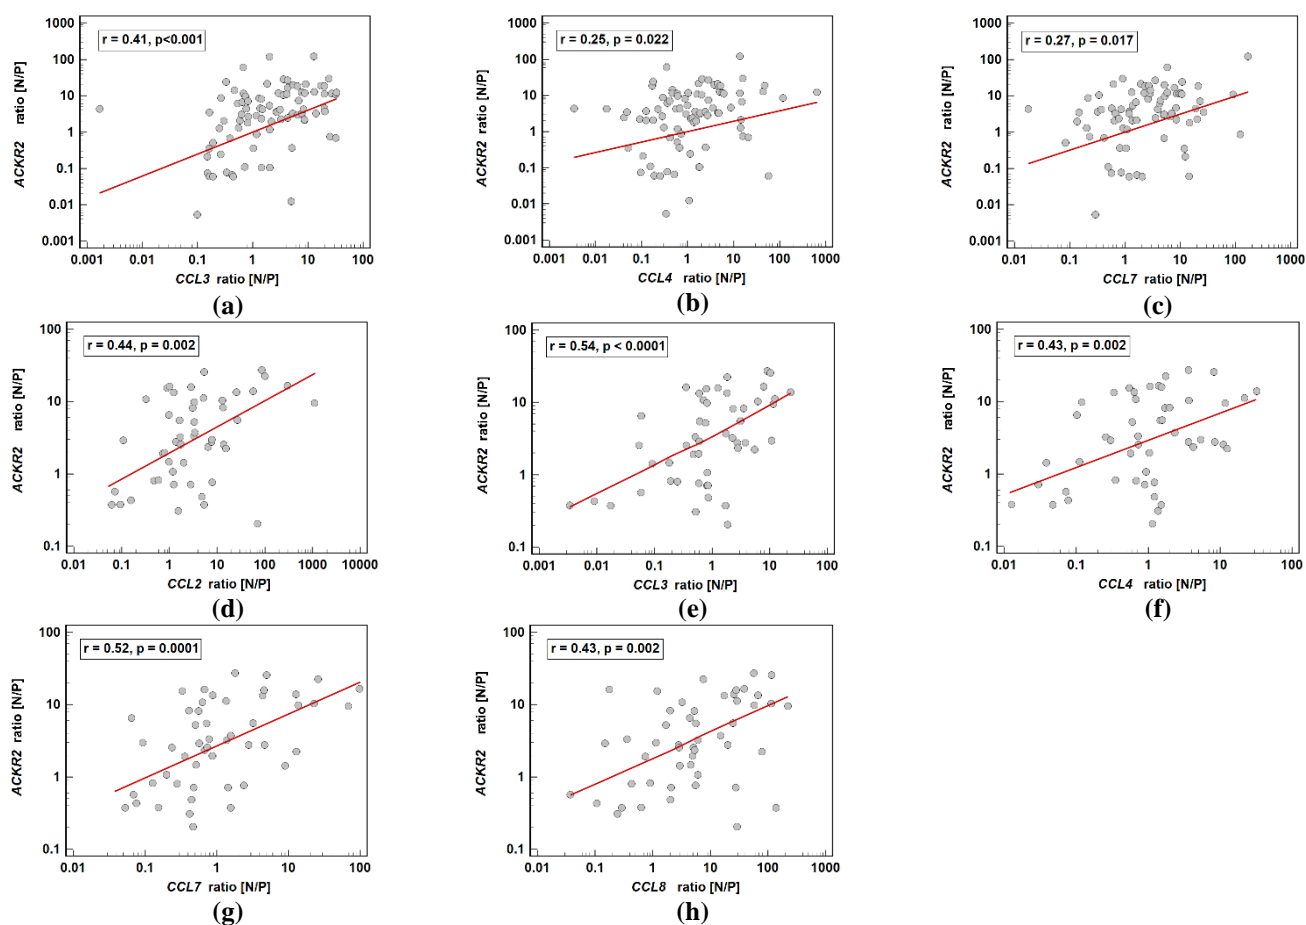

**Figure S6.** Correlation between ACKR2 and chemokine expression: (a) CCL3 in polyps; (b) CCL4 in polyps; (c) CCL7 in polyps; (d) CCL2 in adenocarcinomas; (e) CCL3 in adenocarcinomas; (f) CCL4 in adenocarcinomas; (g) CCL7 in adenocarcinomas; (h) CCL8 in adenocarcinomas. Data presented as scatter-plots with a trend line and Pearson correlation coefficient (r). N/T, normal-to-tumor expression ratio.
